# Supplementary material for: A novel class of chemicals that react with abasic sites in DNA and specifically kill B cell cancers
Source: PubMed Central journal article supplement (PMC5605088; doi:10.1371/journal.pone.0185010), 2017-09-19
Supplement: pone.0185010.s001.pdf [file pone.0185010.s001.pdf]

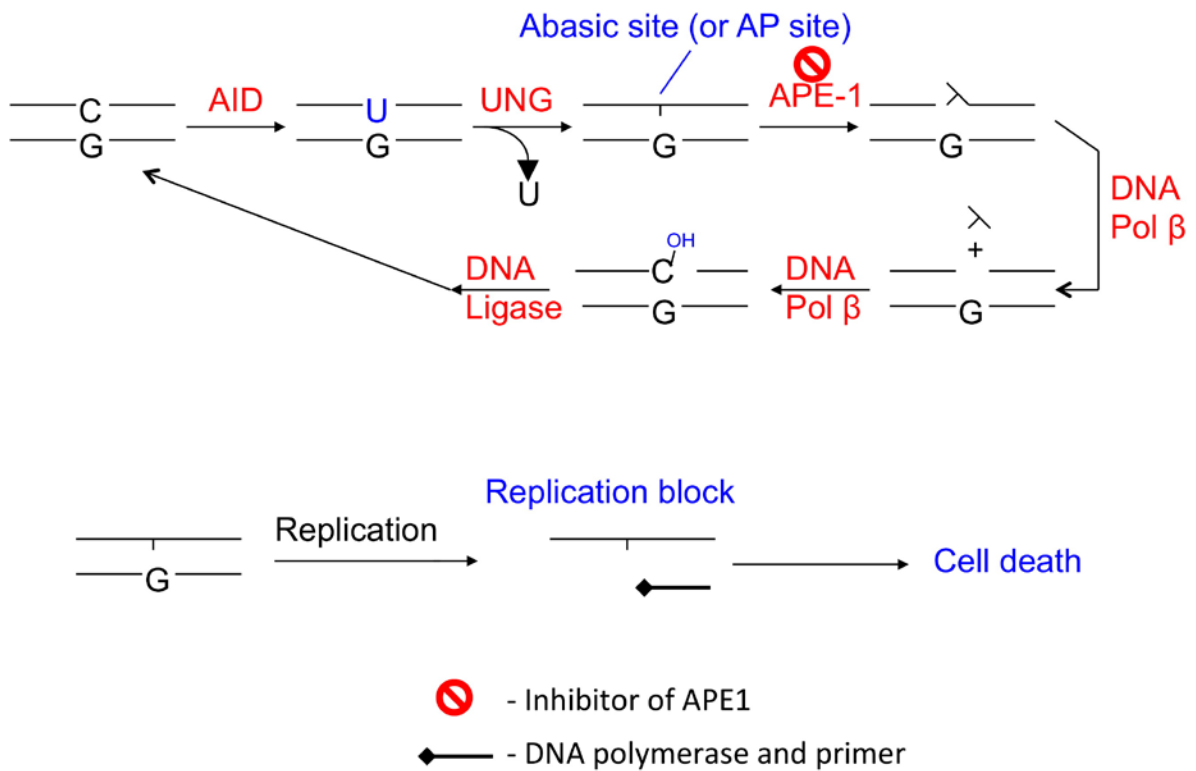

### S1 Figure. A model for cell killing by AA3.

Top- Rationale for cell killing by AA3. B-NHL cells overexpress activation-induced deaminase (AID) which converts cytosine into uracil and results in the accumulation of uracils in their genome. These cells also contain uracil-DNA glycosylase (UNG) that removes these uracils generating AP sites. AP sites are further processed by the AP endonuclease (APE-1) and repaired through the actions of DNA polymerase  $\beta$ .

Bottom- AA3 inhibits the activity of APE1 by reacting with AP sites and blocks the progress of replication fork causing cell death.
