# Supplementary material for: A novel class of chemicals that react with abasic sites in DNA and specifically kill B cell cancers
Source: PubMed Central journal article supplement (PMC5605088; doi:10.1371/journal.pone.0185010), 2017-09-19
Supplement: pone.0185010.s002.pdf [file pone.0185010.s002.pdf]

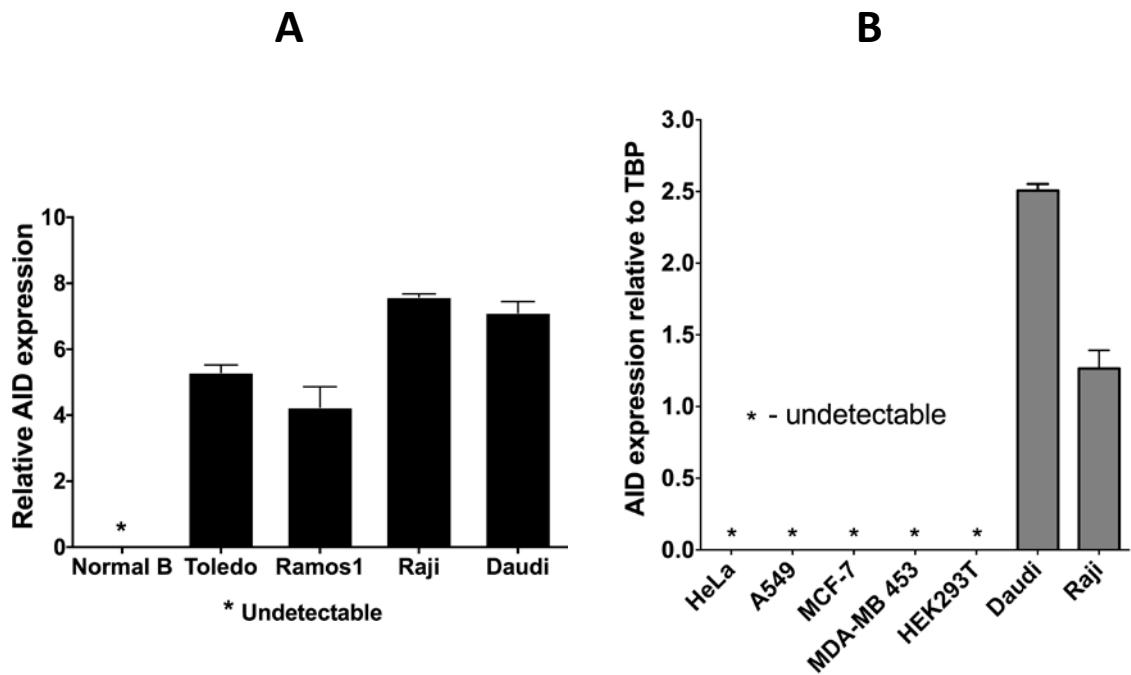

**S2 Figure. AID expression levels in B-NHL and non-B cell lines.**

**A.** The levels of AID gene expression were determined using real-time PCR and are shown relative to gene expression levels of GAPDH set at 100. These data are from Shalhout *et al* (2014)<sup>1</sup>. **B.** The levels of AID gene expression were determined using real-time PCR and are shown relative to gene expression levels of TBP. The asterisk (\*) indicates undetectable AID expression.

<sup>1</sup> Shalhout, S., et al. (2014). "Genomic uracil homeostasis during normal B cell maturation and loss of this balance during B cell cancer development." *Mol Cell Biol* **34**(21): 4019-4032.
