# Supplementary material for: A novel class of chemicals that react with abasic sites in DNA and specifically kill B cell cancers
Source: PubMed Central journal article supplement (PMC5605088; doi:10.1371/journal.pone.0185010), 2017-09-19
Supplement: pone.0185010.s004.pdf [file pone.0185010.s004.pdf]

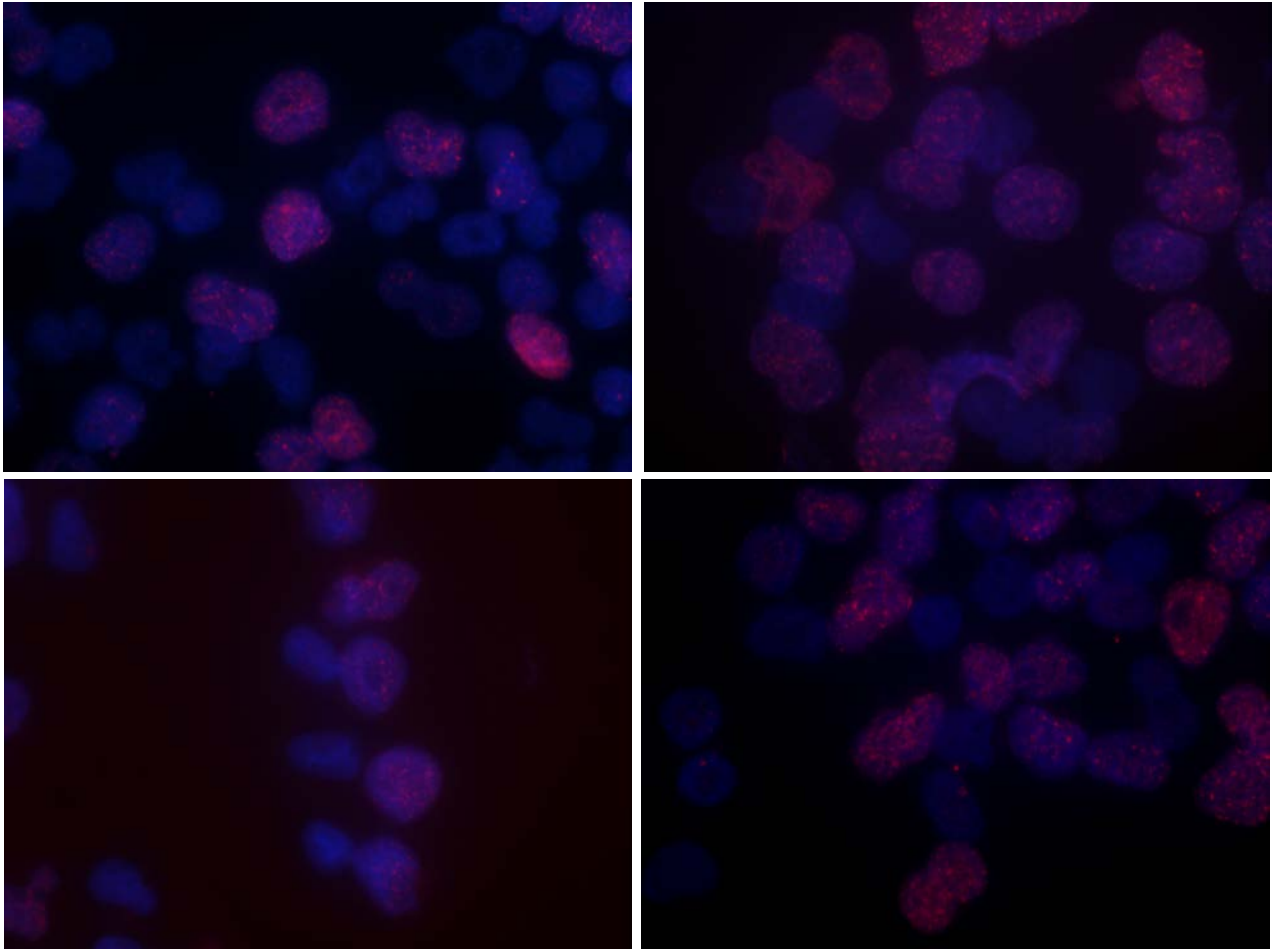

**S4 Figure. Visualization of  $\gamma$ -H2AX in Daudi nuclei following AA3 treatment at 60X magnification using Nikon E800 fluorescence microscope.**

Representative  $\gamma$ -H2AX immunofluorescence images of Daudi cells after 5-hour AA3 treatment are shown. The cells were stained with anti  $\gamma$ -H2AX antibody (red) and DAPI (blue).
