# Supplementary material for: A novel class of chemicals that react with abasic sites in DNA and specifically kill B cell cancers
Source: PubMed Central journal article supplement (PMC5605088; doi:10.1371/journal.pone.0185010), 2017-09-19
Supplement: pone.0185010.s005.pdf [file pone.0185010.s005.pdf]

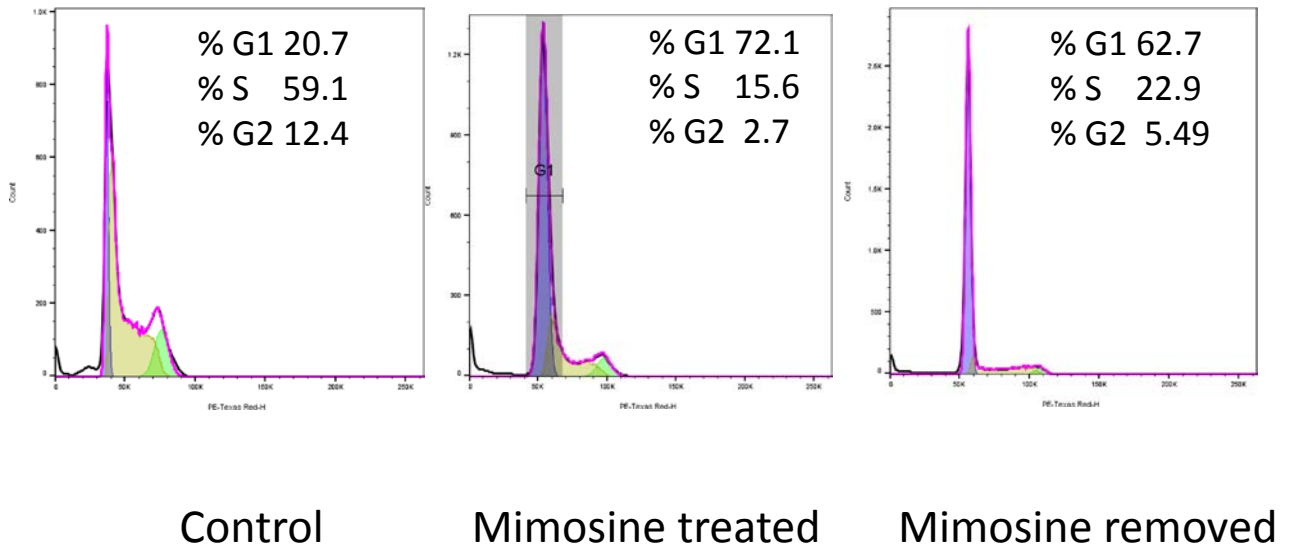

**S5 Figure. Cell cycle analysis by flow cytometry following mimosine treatment.**

Left- Untreated Daudi cells (control). Following a 24 hr mimosine treatment, the cells were divided into two parts. One culture was grown in medium containing Mimosine for 4 hours (Center; Mimosine treated). The other culture was grown in normal growth media for the same length of time (Right; Mimosine removed). All the cells were collected, and stained with propidium iodide for flow cytometric analysis.
