# Supplementary material for: A novel class of chemicals that react with abasic sites in DNA and specifically kill B cell cancers
Source: PubMed Central journal article supplement (PMC5605088; doi:10.1371/journal.pone.0185010), 2017-09-19
Supplement: pone.0185010.s006.pdf [file pone.0185010.s006.pdf]

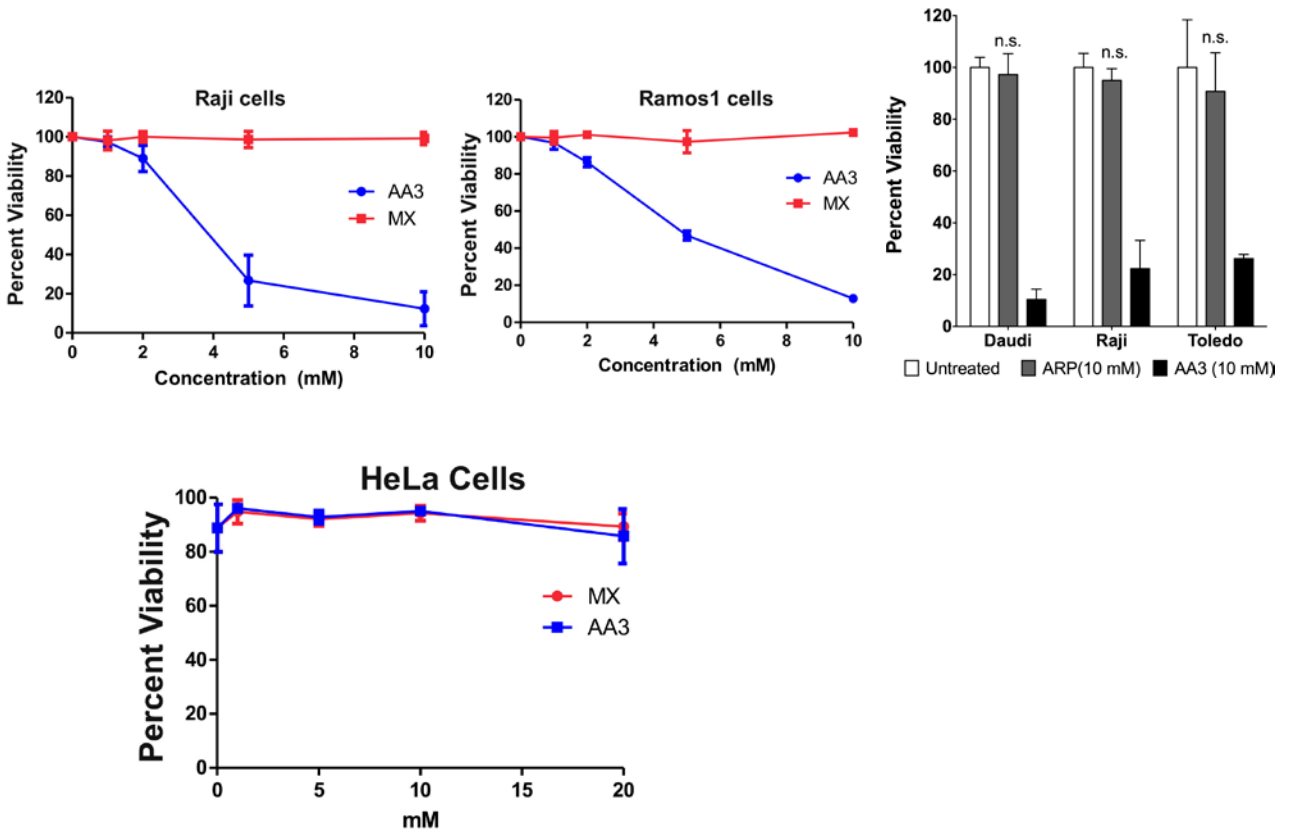

**S6 Figure. The lack of cytotoxicity of MX and ARP for B-NHL and HeLa cell lines.**

The cells were treated with MX, ARP or AA3 for 24 hours, and cell killing was analyzed. The mean and standard deviation are shown in each case (n.s. = not significant).
