# Supplementary material for: A novel class of chemicals that react with abasic sites in DNA and specifically kill B cell cancers
Source: PubMed Central journal article supplement (PMC5605088; doi:10.1371/journal.pone.0185010), 2017-09-19
Supplement: pone.0185010.s008.pdf [file pone.0185010.s008.pdf]

|                 |          |          |          |          |          |          |          |
|-----------------|----------|----------|----------|----------|----------|----------|----------|
| Ung             | -        | +        | +        | +        | +        | +        | +        |
| AA3             | -        | -        | +        | -        | -        | 1st      | -        |
| ssARP           | -        | -        | -        | +        | -        | 2nd      | 2nd      |
| AA5             | -        | -        | -        | -        | +        | -        | 1st      |
| Percent Product |          |          |          | 94       |          | 23       | 26       |
|                 | <b>1</b> | <b>2</b> | <b>3</b> | <b>4</b> | <b>5</b> | <b>6</b> | <b>7</b> |

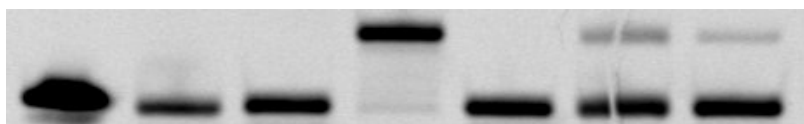

**S8 Figure. AA5 blocks the reaction of ARP at AP sites in DNA.**

The experimental procedure was the same as described for Supplementary Figure S7.
