# Supplementary material for: A novel class of chemicals that react with abasic sites in DNA and specifically kill B cell cancers
Source: PubMed Central journal article supplement (PMC5605088; doi:10.1371/journal.pone.0185010), 2017-09-19
Supplement: pone.0185010.s010.pdf [file pone.0185010.s010.pdf]

|                 |   |   |    |   |     |   |     |
|-----------------|---|---|----|---|-----|---|-----|
| UDG             | - | + | +  | + | +   | + | +   |
| ssARP           | - | - | +  | - | 2nd | - | 2nd |
| AA6             | - | - | -  | + | 1st | - | -   |
| AA8             | - | - | -  | - | -   | + | 1st |
| Percent product | - | - | 97 | - | 7   | - | 22  |

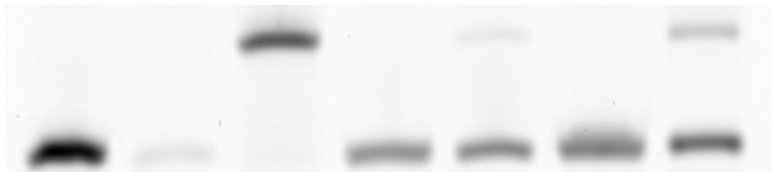

**S10 Figure. AA8 blocks reaction of ARP at AP sites in DNA.**

The experimental procedure was the same as described for Supplementary Figure S7.
