# Supplementary material for: A novel class of chemicals that react with abasic sites in DNA and specifically kill B cell cancers
Source: PubMed Central journal article supplement (PMC5605088; doi:10.1371/journal.pone.0185010), 2017-09-19
Supplement: pone.0185010.s012.pdf [file pone.0185010.s012.pdf]

| Gene                     | Forward Primer                   | Reverse Primer             |
|--------------------------|----------------------------------|----------------------------|
| AID                      | 5'-CTGGACTTTGGTTATCTTCG-3'       | 5'-AAGGTCATGATGGCTATTTG-3' |
| UNG2                     | 5'-CCTCCTCAGCTCCAGGATGA-3'       | 5'-TCGCTTCCTGGCGGG-3'      |
| PoI $\beta$              | 5'-GAACACTCTGGGGTTCTCGG-3'       | 5'-TGTGGATAGCTTGGCTCACG-3' |
| APE-1                    | 5'-GATCTCGCGAGTAGGGCAAC-3'       | 5'-TTTGCGGCCGTCTTACTCTT-3' |
| XRCC1                    | 5'-GACGTTGACATGCCGGAGAT-3'       | 5'-GAGATGGTCTTCTCGCCTGC-3' |
| $\beta$ -ACTIN<br>(ACTB) | 5'-TTGCCGACAGGATGCAGAAGGA-<br>3' | 5'-AGGTGGACAGCGAGGCCAG-3'  |

**S1 Table. Primers used for RT-PCR**
